# Supplementary material for: Metabolic profile analysis of Zhi-zi-chi decoction in feces of normal and chronic unpredictable mild stress-induced depression rats based on UHPLC-ESI-Q-TOF-MS/MS and multiple analytical strategies
Source: Royal Society of Chemistry journal article supplement (doi:10.1039/c9ra06486a), 2019-01-01
Supplement: c9ra06486a1.pdf [file c9ra06486a1.pdf]

**Metabolic profile analysis of *Zhi-zi-chi* decoction in feces of normal and chronic unpredictable mild stress-induced depression rats based on UHPLC–ESI–Q–TOF–MS/MS and multiple analytical strategies**

Kaiwen Luo\*#, Yadong Xing#

**Author affiliations:** School of Pharmacy, Bengbu Medical University, No. 2600

Donghai Avenue, Bengbu, 233030, China

**\*Author for correspondence:** Tel.: +86 0552-3175452, E-mail addresses: kevinrowe@163.com

#These authors contributed equally to this work.

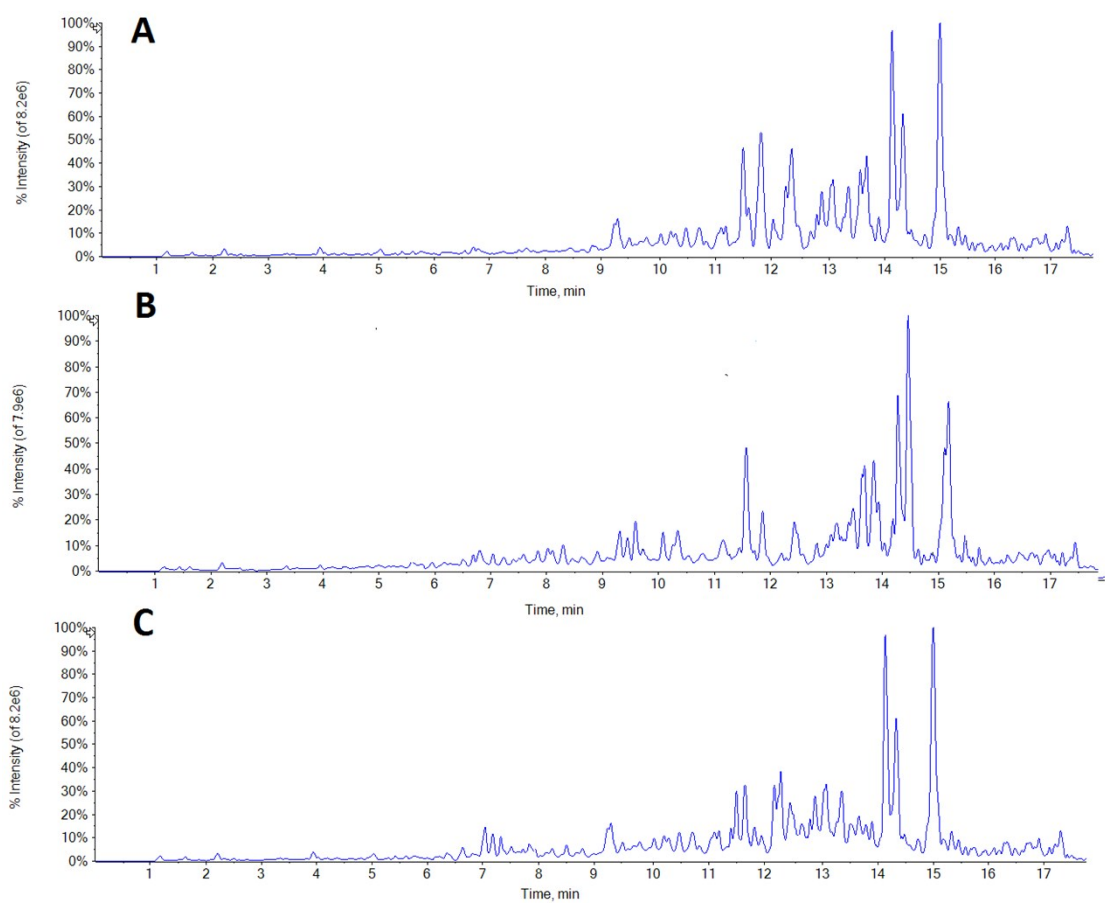

Fig. S1 Typical UHPLC-ESI-Q-TOF-MS/MS chromatograms. UHPLC-ESI-Q-TOF-MS/MS chromatograms total ion chromatograms (TICs) of control rat feces (A), normal+ZZCD rat feces (B) and CUMS+ZZCD (C) in positive mode.

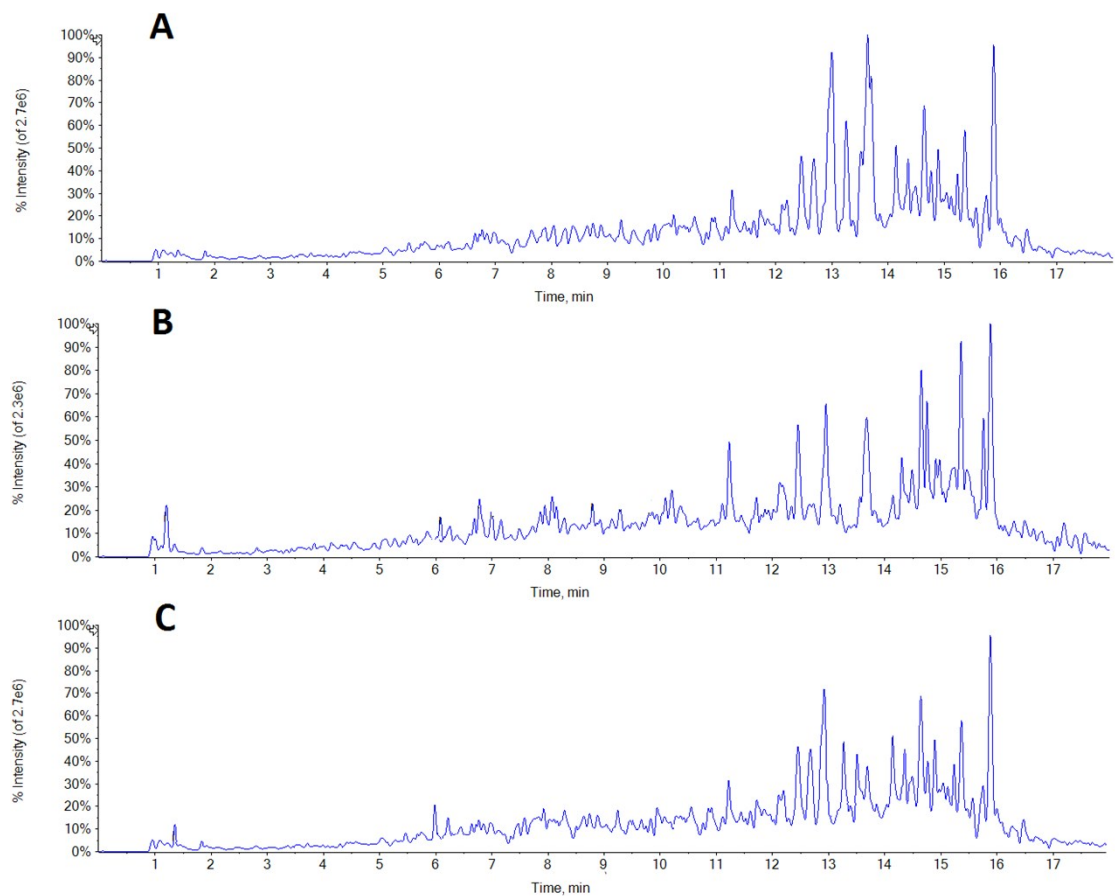

Fig. S2 Typical UHPLC-ESI-Q-TOF-MS/MS chromatograms. UHPLC-ESI-Q-TOF-MS/MS chromatograms total ion chromatograms (TICs) of control rat feces (A), normal+ZZCD rat feces (B) and CUMS+ZZCD rat feces (C) in negative mode.

IDA Dependent Sum from POS-5.wiff (sample 1) - 20190125-POS-LKW-5, Gaussian smoothed

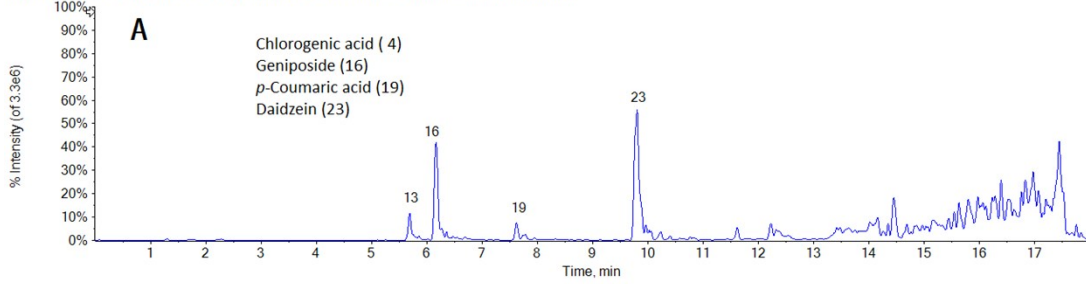

IDA Dependent Sum from NEG-5.wiff (sample 1) - 20190125-NEG-LKW-5, Gaussian smoothed

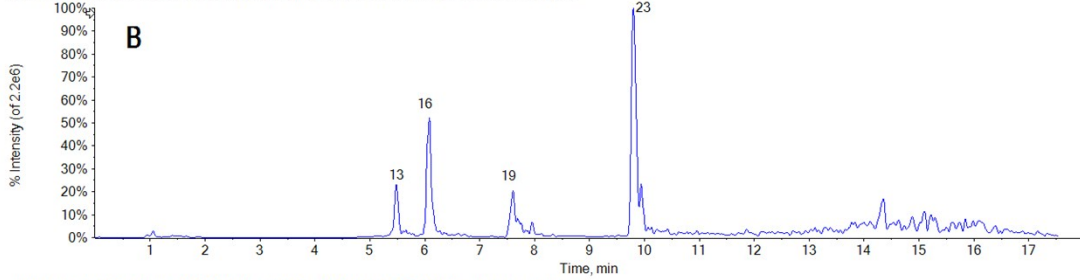

IDA Dependent Sum from POS-6.wiff (sample 1) - 20190125-POS-LKW-6, Gaussian smoothed

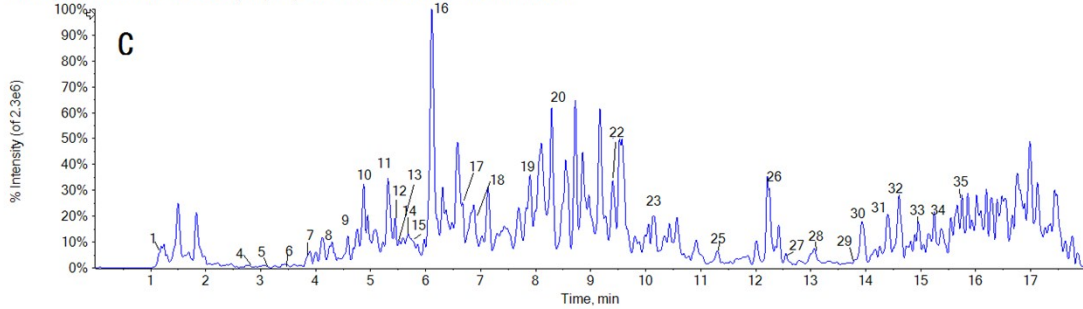

IDA Dependent Sum from NEG-6.wiff (sample 1) - 20190125-NEG-LKW-6, Gaussian smoothed

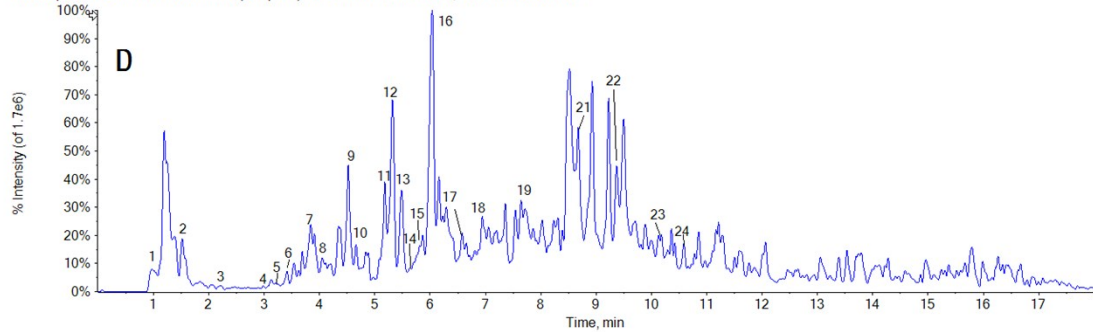

Fig. S3 Typical UHPLC-ESI-Q-TOF-MS/MS chromatograms. UHPLC-ESI-Q-TOF-MS/MS chromatograms total ion chromatograms (TICs) of four standard compounds in positive mode (A) and negative mode (B); TICs of ZZCD in positive mode (C) and negative mode (D).

**Iridoid glycosides**

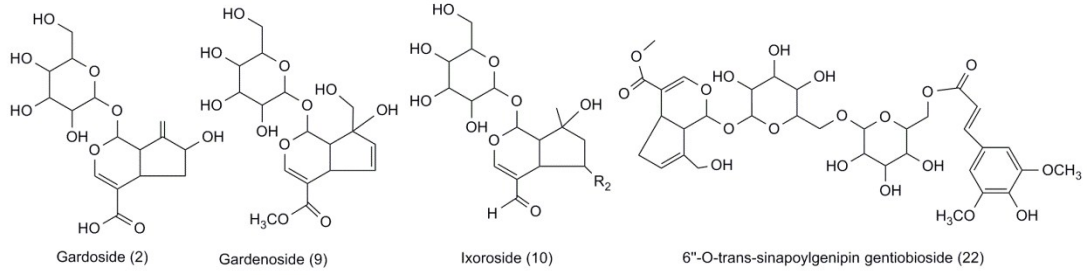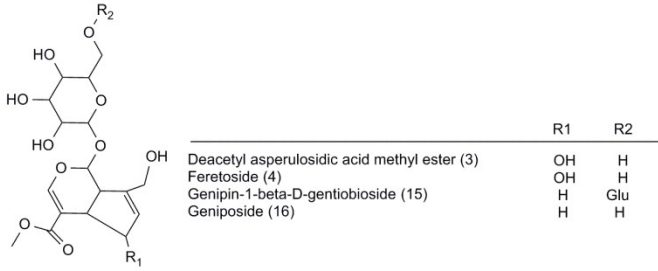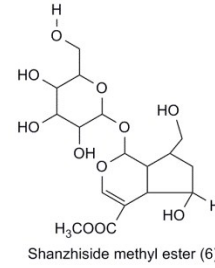

**Quinic acid derivatives**

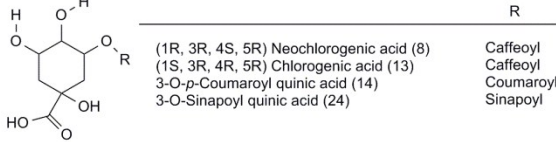

**Monoterpenoids**

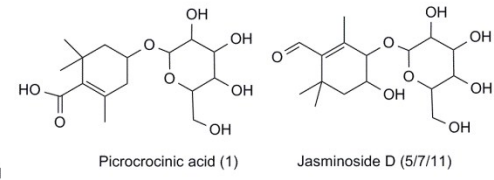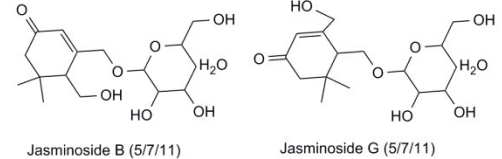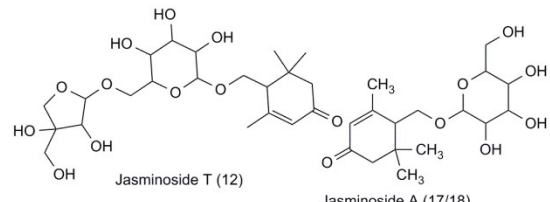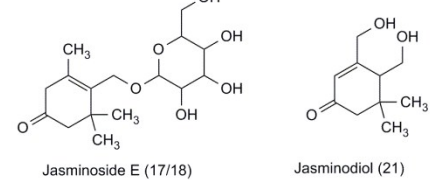

**Flavonoids**

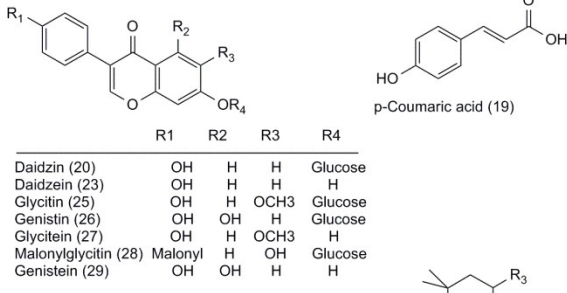

**Soyasaponins**

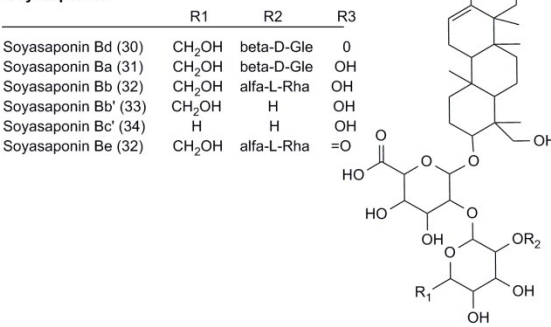

Fig. S4. Molecular structural formulas of prototype constituents of ZZCD in rat feces.

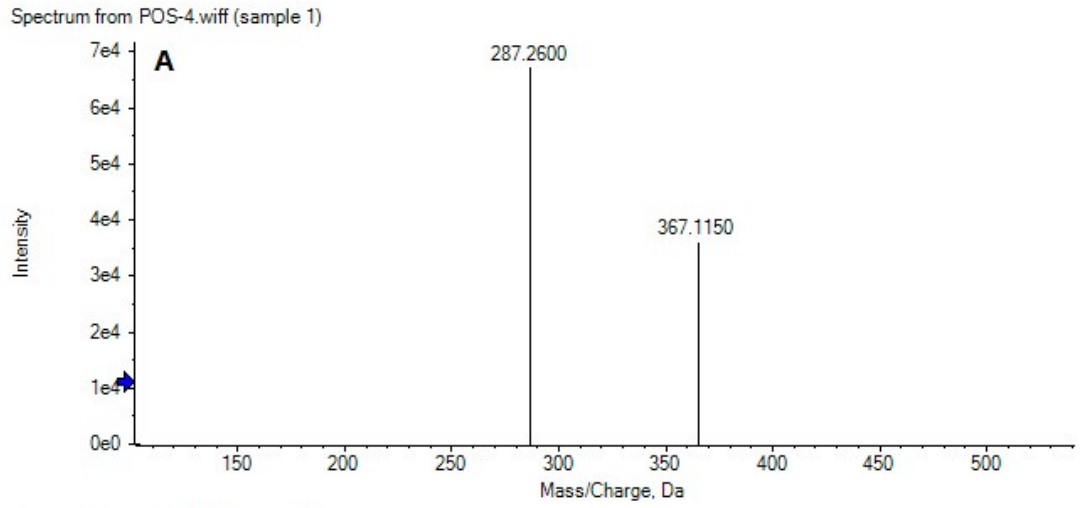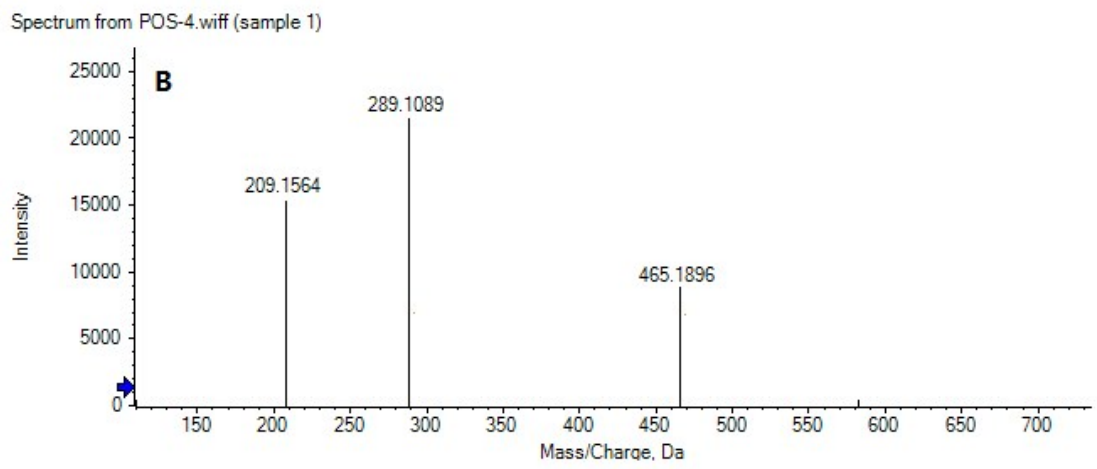

Fig. S5. MS/MS spectra of M11 (A) and M17 (B).

**Table S1.** Identification of prototype constituents of ZZCD in feces of rat model of depression by UHPLC-Q-TOF-MS/MS

| No. | $t_R$ (min) | [M+Na] <sup>+</sup> $m/z$<br>Detected | ppm   | [M-H] <sup>-</sup> $m/z$<br>Detected | ppm         | MW(Da)   | Formula                                         | MS/MS<br>ESI+                                                                                                                                                                    | ESI-                                                                                                                                                                                                                                                                                                                                                                                                                                                                | Identification                                  | Source |
|-----|-------------|---------------------------------------|-------|--------------------------------------|-------------|----------|-------------------------------------------------|----------------------------------------------------------------------------------------------------------------------------------------------------------------------------------|---------------------------------------------------------------------------------------------------------------------------------------------------------------------------------------------------------------------------------------------------------------------------------------------------------------------------------------------------------------------------------------------------------------------------------------------------------------------|-------------------------------------------------|--------|
| 1   | 1.006       | 369.1512                              | -2.1  | 381.1308 <sup>☆</sup>                | -3.4        | 346.1628 | C <sub>16</sub> H <sub>26</sub> O <sub>8</sub>  | 207[M + Na-162] <sup>+</sup><br>177[M + Na-162-2CH <sub>3</sub> ] <sup>+</sup><br>189[M + Na-162-H <sub>2</sub> O] <sup>+</sup><br>163[M + Na-162-CO <sub>2</sub> ] <sup>+</sup> | 345[M-H] <sup>-</sup>                                                                                                                                                                                                                                                                                                                                                                                                                                               | Picrocrocinic acid (M)                          | ZZ     |
| 2   | 2.170       | -                                     | -     | 373.1142<br>409.0911 <sup>☆</sup>    | 0.5<br>1.0  | 374.1213 | C <sub>16</sub> H <sub>22</sub> O <sub>10</sub> | -                                                                                                                                                                                | 167[M-H-CO <sub>2</sub> -C <sub>6</sub> H <sub>10</sub> O <sub>5</sub> ] <sup>-</sup><br>149[M-H-CO <sub>2</sub> -C <sub>6</sub> H <sub>12</sub> O <sub>6</sub> ] <sup>-</sup><br>123[M-H-C <sub>6</sub> H <sub>10</sub> O <sub>5</sub> -C <sub>3</sub> H <sub>4</sub> O <sub>3</sub> ] <sup>-</sup>                                                                                                                                                                | Gardoside (I)                                   | ZZ     |
| 3   | 2.813       | -                                     | -     | 403.1262                             | 4.0         | 404.1319 | C <sub>17</sub> H <sub>24</sub> O <sub>11</sub> | 265[M + Na-162] <sup>+</sup><br>247[M + Na-162-H <sub>2</sub> O] <sup>+</sup>                                                                                                    | 241[M-H-162] <sup>-</sup>                                                                                                                                                                                                                                                                                                                                                                                                                                           | Deacetylasperulosidic acid methyl ester (I)     | ZZ     |
| 4   | 3.094       | 427.1227                              | 3.8   | 439.1021 <sup>☆</sup>                | 1.8         | 404.1319 | C <sub>17</sub> H <sub>24</sub> O <sub>11</sub> | 265[M + Na-162] <sup>+</sup><br>247[M + Na-162-H <sub>2</sub> O] <sup>+</sup>                                                                                                    | 241[M-H-162] <sup>-</sup>                                                                                                                                                                                                                                                                                                                                                                                                                                           | Feretoside (I)                                  | ZZ     |
| 5   | 3.402       | 369.1521                              | -0.3  | 381.1308 <sup>☆</sup>                | 3.7         | 346.1628 | C <sub>16</sub> H <sub>26</sub> O <sub>8</sub>  | -                                                                                                                                                                                | 381[M + Cl] <sup>-</sup><br>327[M-H-H <sub>2</sub> O] <sup>-</sup><br>165[M-H-H <sub>2</sub> O-162] <sup>-</sup><br>331[M-H-CH <sub>2</sub> ] <sup>-</sup><br>289[M-H-C <sub>4</sub> H <sub>8</sub> ] <sup>-</sup><br>247[M-H-C <sub>4</sub> H <sub>8</sub> -C <sub>2</sub> H <sub>2</sub> O] <sup>-</sup><br>127[M-H-C <sub>4</sub> H <sub>8</sub> -162] <sup>-</sup>                                                                                              | Jasminoside B/D/G (M)                           | ZZ     |
| 6   | 3.834       | 407.1543                              | -1.2  | 405.1415                             | -0.8        | 406.1475 | C <sub>17</sub> H <sub>26</sub> O <sub>11</sub> | -                                                                                                                                                                                | 405[M-H] <sup>-</sup><br>225[M-H-C <sub>6</sub> H <sub>10</sub> O <sub>5</sub> -H <sub>2</sub> O] <sup>-</sup><br>123[M-H-C <sub>6</sub> H <sub>10</sub> O <sub>5</sub> -C <sub>4</sub> H <sub>6</sub> O <sub>3</sub> ] <sup>-</sup><br>101[M-H-C <sub>6</sub> H <sub>10</sub> O <sub>5</sub> -C <sub>7</sub> H <sub>10</sub> O <sub>3</sub> ] <sup>-</sup>                                                                                                         | Shanzhiside methyl ester (I)                    | ZZ     |
| 7   | 4.147       | 369.1517                              | -0.8  | 381.1321 <sup>☆</sup>                | -0.3        | 346.1628 | C <sub>16</sub> H <sub>26</sub> O <sub>8</sub>  | -                                                                                                                                                                                | 381[M + Cl] <sup>-</sup><br>327[M-H-H <sub>2</sub> O] <sup>-</sup><br>165[M-H-H <sub>2</sub> O-162] <sup>-</sup><br>331[M-H-CH <sub>2</sub> ] <sup>-</sup><br>289[M-H-C <sub>4</sub> H <sub>8</sub> ] <sup>-</sup><br>247[M-H-C <sub>4</sub> H <sub>8</sub> -C <sub>2</sub> H <sub>2</sub> O] <sup>-</sup><br>127[M-H-C <sub>4</sub> H <sub>8</sub> -162] <sup>-</sup>                                                                                              | Jasminoside B/D/G (M)                           | ZZ     |
| 8   | 1.347       | 377.0837                              | -1.6  | 353.0877                             | -0.3        | 354.0951 | C <sub>16</sub> H <sub>18</sub> O <sub>9</sub>  | -                                                                                                                                                                                | 191[M-H-caffeoyl] <sup>-</sup><br>179[M-H-C <sub>7</sub> H <sub>10</sub> O <sub>5</sub> ] <sup>-</sup>                                                                                                                                                                                                                                                                                                                                                              | Neochlorogenic acid (QA)                        | ZZ     |
| 9   | 4.551       | 427.1225                              | 3.3   | 403.1231                             | -3.7        | 404.1319 | C <sub>17</sub> H <sub>24</sub> O <sub>11</sub> | 265[M + Na-162] <sup>+</sup><br>247[M + Na-162-H <sub>2</sub> O] <sup>+</sup>                                                                                                    | 403[M-H] <sup>-</sup><br>241[M-H-C <sub>6</sub> H <sub>10</sub> O <sub>5</sub> ] <sup>-</sup><br>223[M-H-C <sub>6</sub> H <sub>12</sub> O <sub>6</sub> ] <sup>-</sup>                                                                                                                                                                                                                                                                                               | Gardenoside (I)                                 | ZZ     |
| 10  | 4.711       | 383.1312                              | 0.14  | 359.1365<br>395.1132 <sup>☆</sup>    | 4.7<br>4.6  | 360.142  | C <sub>16</sub> H <sub>24</sub> O <sub>9</sub>  | -                                                                                                                                                                                | 197[M-H-162] <sup>-</sup><br>179[M-H-162-H <sub>2</sub> O] <sup>-</sup><br>151[M-H-162-H <sub>2</sub> O-CO] <sup>-</sup><br>161[M-H-162-2H <sub>2</sub> O] <sup>-</sup><br>125[M-H-162-C <sub>3</sub> H <sub>4</sub> O <sub>2</sub> ] <sup>-</sup><br>107[M-H-162-C <sub>3</sub> H <sub>4</sub> O <sub>2</sub> -H <sub>2</sub> O] <sup>-</sup>                                                                                                                      | Ixoroside (I)                                   | ZZ     |
| 11  | 4.901       | 369.1523                              | 0.8   | 381.1253 <sup>☆</sup>                | 8.4         | 346.1628 | C <sub>16</sub> H <sub>26</sub> O <sub>8</sub>  | -                                                                                                                                                                                | 381[M + Cl] <sup>-</sup><br>327[M-H-H <sub>2</sub> O] <sup>-</sup><br>165[M-H-H <sub>2</sub> O-162] <sup>-</sup><br>331[M-H-CH <sub>2</sub> ] <sup>-</sup><br>289[M-H-C <sub>4</sub> H <sub>8</sub> ] <sup>-</sup><br>247[M-H-C <sub>4</sub> H <sub>8</sub> -C <sub>2</sub> H <sub>2</sub> O] <sup>-</sup><br>127[M-H-C <sub>4</sub> H <sub>8</sub> -162] <sup>-</sup>                                                                                              | Jasminoside B/D/G (M)                           | ZZ     |
| 12  | 5.270       | 485.1995                              | -0.34 | 497.1776 <sup>☆</sup>                | -3.8        | 462.2101 | C <sub>21</sub> H <sub>34</sub> O <sub>11</sub> | -                                                                                                                                                                                | 461[M-H] <sup>-</sup><br>311[M-H-C <sub>10</sub> H <sub>14</sub> O] <sup>-</sup><br>293[M-H-C <sub>10</sub> H <sub>14</sub> O-H <sub>2</sub> O] <sup>-</sup>                                                                                                                                                                                                                                                                                                        | Jasminoside T (M)                               | ZZ     |
| 13  | 5.482       | 377.0839                              | -1.1  | 353.0891                             | 3.7         | 354.0951 | C <sub>16</sub> H <sub>18</sub> O <sub>9</sub>  | -                                                                                                                                                                                | 191[M-H-caffeoyl] <sup>-</sup><br>335[M-H-H <sub>2</sub> O] <sup>-</sup>                                                                                                                                                                                                                                                                                                                                                                                            | Chlorogenic acid <sup>5</sup> (QA) <sup>5</sup> | ZZ     |
| 14  | 5.656       | 361.0898                              | 1.1   | 337.0907                             | -1.7        | 338.1002 | C <sub>16</sub> H <sub>18</sub> O <sub>8</sub>  | -                                                                                                                                                                                | 337[M-H] <sup>-</sup><br>191[M-H-Coumaroyl] <sup>-</sup><br>173[M-H-Coumaroyl-H <sub>2</sub> O] <sup>-</sup>                                                                                                                                                                                                                                                                                                                                                        | 3-O-p-Coumaroyl quinic acid (QA)                | ZZ     |
| 15  | 5.852       | 573.1783                              | 1.21  | 585.1562 <sup>☆</sup><br>549.1828    | -5.1<br>0.5 | 550.1898 | C <sub>23</sub> H <sub>34</sub> O <sub>15</sub> | -                                                                                                                                                                                | 549[M-H] <sup>-</sup><br>225[M-H-2C <sub>6</sub> H <sub>10</sub> O <sub>5</sub> ] <sup>-</sup><br>207[M-H-C <sub>6</sub> H <sub>12</sub> O <sub>6</sub> -C <sub>6</sub> H <sub>10</sub> O <sub>5</sub> ] <sup>-</sup><br>123[M-H-2C <sub>6</sub> H <sub>10</sub> O <sub>5</sub> -C <sub>4</sub> H <sub>6</sub> O <sub>3</sub> ] <sup>-</sup><br>101[M-H-2C <sub>6</sub> H <sub>10</sub> O <sub>5</sub> -C <sub>7</sub> H <sub>8</sub> O <sub>2</sub> ] <sup>-</sup> | Genipin-1-β-D-gentiobioside (I)                 | ZZ     |

| No. | $t_R$ (min) | [M+Na] <sup>+</sup> $m/z$<br>Detected | ppm          | [M-H] <sup>-</sup> $m/z$<br>Detected | ppm         | MW(Da)   | Formula                                         | MS/MS<br>ESI+                                                                                                                                                                                                                                                                                                                                                                                                                                                                                                                                                                                                                                                                                                                                                                                                                 | ESI-                                                                                                                                                                                                                                                                                                                                                                                                                                                                                                                                    | Identification                                | Source |
|-----|-------------|---------------------------------------|--------------|--------------------------------------|-------------|----------|-------------------------------------------------|-------------------------------------------------------------------------------------------------------------------------------------------------------------------------------------------------------------------------------------------------------------------------------------------------------------------------------------------------------------------------------------------------------------------------------------------------------------------------------------------------------------------------------------------------------------------------------------------------------------------------------------------------------------------------------------------------------------------------------------------------------------------------------------------------------------------------------|-----------------------------------------------------------------------------------------------------------------------------------------------------------------------------------------------------------------------------------------------------------------------------------------------------------------------------------------------------------------------------------------------------------------------------------------------------------------------------------------------------------------------------------------|-----------------------------------------------|--------|
| 16  | 6.131       | 411.1245                              | 4.06         | 387.1289                             | -2.1        | 388.1369 | C <sub>17</sub> H <sub>24</sub> O <sub>10</sub> | -                                                                                                                                                                                                                                                                                                                                                                                                                                                                                                                                                                                                                                                                                                                                                                                                                             | 387[M-H] <sup>-</sup><br>225[M-H-C <sub>6</sub> H <sub>10</sub> O <sub>5</sub> ] <sup>-</sup><br>207[M-H-C <sub>6</sub> H <sub>12</sub> O <sub>6</sub> ] <sup>-</sup><br>147[M-H-C <sub>6</sub> H <sub>12</sub> O <sub>6</sub> -C <sub>2</sub> H <sub>4</sub> O <sub>2</sub> ] <sup>-</sup><br>123[M-H-C <sub>6</sub> H <sub>10</sub> O <sub>5</sub> -C <sub>4</sub> H <sub>6</sub> O <sub>3</sub> ] <sup>-</sup><br>101[M-H-C <sub>6</sub> H <sub>10</sub> O <sub>5</sub> -C <sub>7</sub> H <sub>8</sub> O <sub>2</sub> ] <sup>-</sup> | Geniposide <sup>5</sup> (I)                   | ZZ     |
| 17  | 6.781       | 353.1581                              | -2.9         | 329.1611                             | 1.5         | 330.1679 | C <sub>16</sub> H <sub>26</sub> O <sub>7</sub>  | 331[M+H] <sup>+</sup><br>169[M+H-C <sub>6</sub> H <sub>10</sub> O <sub>5</sub> ] <sup>+</sup><br>151[M+H-C <sub>6</sub> H <sub>12</sub> O <sub>6</sub> ] <sup>+</sup>                                                                                                                                                                                                                                                                                                                                                                                                                                                                                                                                                                                                                                                         | -                                                                                                                                                                                                                                                                                                                                                                                                                                                                                                                                       | Jasminoside A/E (M)                           | ZZ     |
| 18  | 6.999       | 353.1567                              | -1.0         | 389.1815*<br>365.1381 <sup>32</sup>  | -0.5<br>2.2 | 330.1679 | C <sub>16</sub> H <sub>26</sub> O <sub>7</sub>  | 331[M+H] <sup>+</sup><br>169[M+H-C <sub>6</sub> H <sub>10</sub> O <sub>5</sub> ] <sup>+</sup><br>151[M+H-C <sub>6</sub> H <sub>12</sub> O <sub>6</sub> ] <sup>+</sup>                                                                                                                                                                                                                                                                                                                                                                                                                                                                                                                                                                                                                                                         | -                                                                                                                                                                                                                                                                                                                                                                                                                                                                                                                                       | Jasminoside A/E (M)                           | ZZ     |
| 19  | 7.601       | 165.0551 <sup>o</sup>                 | 2.9          | 163.0402                             | 0.6         | 164.0473 | C <sub>9</sub> H <sub>8</sub> O <sub>3</sub>    | -                                                                                                                                                                                                                                                                                                                                                                                                                                                                                                                                                                                                                                                                                                                                                                                                                             | 163 [M-H] <sup>-</sup><br>119 [M-H-CO <sub>2</sub> ] <sup>-</sup>                                                                                                                                                                                                                                                                                                                                                                                                                                                                       | p-Coumaric acid <sup>5</sup> (OA)             | ZZ     |
| 20  | 8.187       | 439.0996<br>417.1198                  | 0.8<br>4.3   |                                      |             | 416.1107 | C <sub>21</sub> H <sub>20</sub> O <sub>9</sub>  | 417[M+H] <sup>+</sup><br>255[M+H-C <sub>6</sub> H <sub>10</sub> O <sub>5</sub> ] <sup>+</sup><br>199[M+H-C <sub>6</sub> H <sub>10</sub> O <sub>5</sub> -2CO] <sup>+</sup>                                                                                                                                                                                                                                                                                                                                                                                                                                                                                                                                                                                                                                                     |                                                                                                                                                                                                                                                                                                                                                                                                                                                                                                                                         | Daidzin (F)                                   | DDC    |
| 21  | 8.621       | -                                     | -            | 183.1019                             | -4.4        | 184.1099 | C <sub>10</sub> H <sub>16</sub> O <sub>3</sub>  | -                                                                                                                                                                                                                                                                                                                                                                                                                                                                                                                                                                                                                                                                                                                                                                                                                             | 183[M-H] <sup>-</sup><br>165[M-H-H <sub>2</sub> O] <sup>-</sup><br>147[M-H-2H <sub>2</sub> O] <sup>-</sup>                                                                                                                                                                                                                                                                                                                                                                                                                              | Jasminodiol (M)                               | ZZ     |
| 22  | 9.444       | 779.2375<br>795.2114 <sup>4</sup>     | 0.77<br>0.71 | 755.2409<br>791.2167 <sup>32</sup>   | 0.7<br>-0.5 | 756.2477 | C <sub>34</sub> H <sub>44</sub> O <sub>19</sub> | -                                                                                                                                                                                                                                                                                                                                                                                                                                                                                                                                                                                                                                                                                                                                                                                                                             | 367 [M-H-C <sub>11</sub> H <sub>14</sub> O <sub>5</sub> -162] <sup>-</sup><br>173 [M-H-C <sub>11</sub> H <sub>14</sub> O <sub>5</sub> -162] <sup>-</sup><br>162-MeOH] <sup>-</sup><br>161 [M-H-C <sub>11</sub> H <sub>14</sub> O <sub>5</sub> -162-162-CO <sub>2</sub> ] <sup>-</sup>                                                                                                                                                                                                                                                   | 6''-O-trans-sinapoylgenipin gentiobioside (I) | ZZ     |
| 23  | 10.273      | 255.0689                              | 1.23         | 253.0502                             | -1.6        | 254.0579 | C <sub>15</sub> H <sub>10</sub> O <sub>4</sub>  | 255[M+H] <sup>+</sup><br>227[M+H-CO] <sup>+</sup><br>199[M+H-2CO] <sup>+</sup><br>137[M+H-C <sub>6</sub> H <sub>6</sub> O] <sup>+</sup>                                                                                                                                                                                                                                                                                                                                                                                                                                                                                                                                                                                                                                                                                       |                                                                                                                                                                                                                                                                                                                                                                                                                                                                                                                                         | Daidzein (F) <sup>5</sup>                     | DDC    |
| 24  | 10.664      |                                       |              | 397.1132                             | -2.0        | 398.1213 | C <sub>18</sub> H <sub>22</sub> O <sub>10</sub> |                                                                                                                                                                                                                                                                                                                                                                                                                                                                                                                                                                                                                                                                                                                                                                                                                               | 191 [M-H- Sinapoyl] <sup>-</sup>                                                                                                                                                                                                                                                                                                                                                                                                                                                                                                        | 3-O-Sinapoyl quinic acid (QA)                 | ZZ     |
| 25  | 11.443      | 447.1265 <sup>o</sup>                 | -4.6         |                                      |             | 446.1213 | C <sub>22</sub> H <sub>22</sub> O <sub>10</sub> | 447[M+H] <sup>+</sup><br>285[M+H-C <sub>6</sub> H <sub>10</sub> O <sub>5</sub> ] <sup>+</sup><br>270[M+H-C <sub>6</sub> H <sub>10</sub> O <sub>5</sub> -CH <sub>3</sub> ] <sup>+</sup>                                                                                                                                                                                                                                                                                                                                                                                                                                                                                                                                                                                                                                        |                                                                                                                                                                                                                                                                                                                                                                                                                                                                                                                                         | Glycitin (F)                                  | DDC    |
| 26  | 12.191      | 433.1135 <sup>o</sup>                 | 1.3          |                                      |             | 432.1057 | C <sub>21</sub> H <sub>20</sub> O <sub>10</sub> | 433[M+H] <sup>+</sup><br>241[M+H-C <sub>6</sub> H <sub>10</sub> O <sub>5</sub> ] <sup>+</sup>                                                                                                                                                                                                                                                                                                                                                                                                                                                                                                                                                                                                                                                                                                                                 |                                                                                                                                                                                                                                                                                                                                                                                                                                                                                                                                         | Genistin (F)                                  | DDC    |
| 27  | 12.575      | 285.0749 <sup>o</sup>                 | -2.98        |                                      |             | 284.0685 | C <sub>16</sub> H <sub>12</sub> O <sub>5</sub>  | 285[M+H] <sup>+</sup><br>270[M+H-CH <sub>3</sub> ] <sup>+</sup><br>242[M+H-CH <sub>3</sub> -CO] <sup>+</sup><br>257[M+H-CO] <sup>+</sup><br>229[M+H-2CO] <sup>+</sup><br>167[M+H-C <sub>6</sub> H <sub>6</sub> O] <sup>+</sup>                                                                                                                                                                                                                                                                                                                                                                                                                                                                                                                                                                                                |                                                                                                                                                                                                                                                                                                                                                                                                                                                                                                                                         | Glycitein (F)                                 | DDC    |
| 28  | 13.182      | 533.1292 <sup>o</sup>                 | 0.4          |                                      |             | 532.1217 | C <sub>25</sub> H <sub>24</sub> O <sub>13</sub> | 533[M+H] <sup>+</sup><br>285[M+H-C <sub>2</sub> H <sub>2</sub> O <sub>3</sub> -C <sub>6</sub> H <sub>10</sub> O <sub>5</sub> ] <sup>+</sup>                                                                                                                                                                                                                                                                                                                                                                                                                                                                                                                                                                                                                                                                                   |                                                                                                                                                                                                                                                                                                                                                                                                                                                                                                                                         | Malonylglycitin (F)                           | DDC    |
| 29  | 13.835      | 271.0612 <sup>o</sup>                 | 4.1          |                                      |             | 270.0528 | C <sub>15</sub> H <sub>10</sub> O <sub>5</sub>  | 241[M+H] <sup>+</sup><br>253[M+H-H <sub>2</sub> O] <sup>+</sup><br>243[M+H-CO] <sup>+</sup><br>215[M+H-2CO] <sup>+</sup><br>153[M+H-C <sub>6</sub> H <sub>6</sub> O] <sup>+</sup>                                                                                                                                                                                                                                                                                                                                                                                                                                                                                                                                                                                                                                             |                                                                                                                                                                                                                                                                                                                                                                                                                                                                                                                                         | Genistein (F)                                 | DDC    |
| 30  | 13.930      | 957.5085 <sup>o</sup>                 | 3.3          |                                      |             | 956.4981 | C <sub>48</sub> H <sub>76</sub> O <sub>19</sub> | 957[M+H] <sup>+</sup><br>795[M+H-C <sub>6</sub> H <sub>10</sub> O <sub>5</sub> ] <sup>+</sup><br>633[M+H-2C <sub>6</sub> H <sub>10</sub> O <sub>5</sub> ] <sup>+</sup><br>615[M+H-C <sub>6</sub> H <sub>10</sub> O <sub>5</sub> -C <sub>6</sub> H <sub>12</sub> O <sub>6</sub> ] <sup>+</sup><br>597[M+H-C <sub>6</sub> H <sub>10</sub> O <sub>5</sub> -C <sub>6</sub> H <sub>12</sub> O <sub>6</sub> -H <sub>2</sub> O] <sup>+</sup><br>457[M+H-2C <sub>6</sub> H <sub>10</sub> O <sub>5</sub> -C <sub>6</sub> H <sub>8</sub> O <sub>6</sub> ] <sup>+</sup><br>439[M+H-2C <sub>6</sub> H <sub>10</sub> O <sub>5</sub> -C <sub>6</sub> H <sub>10</sub> O <sub>7</sub> ] <sup>+</sup><br>421[M+H-2C <sub>6</sub> H <sub>10</sub> O <sub>5</sub> -C <sub>6</sub> H <sub>10</sub> O <sub>7</sub> -H <sub>2</sub> O] <sup>+</sup> |                                                                                                                                                                                                                                                                                                                                                                                                                                                                                                                                         | Soyasaponin Bd (S)                            | DDC    |
| 31  | 14.387      | 959.5223 <sup>o</sup>                 | 1.3          |                                      |             | 958.5137 | C <sub>48</sub> H <sub>78</sub> O <sub>19</sub> | 959[M+H] <sup>+</sup><br>797[M+H-C <sub>6</sub> H <sub>10</sub> O <sub>5</sub> ] <sup>+</sup><br>635[M+H-2C <sub>6</sub> H <sub>10</sub> O <sub>5</sub> ] <sup>+</sup><br>617[M+H-C <sub>6</sub> H <sub>10</sub> O <sub>5</sub> -C <sub>6</sub> H <sub>12</sub> O <sub>6</sub> ] <sup>+</sup><br>599[M+H-C <sub>6</sub> H <sub>10</sub> O <sub>5</sub> -C <sub>6</sub> H <sub>12</sub> O <sub>6</sub> -H <sub>2</sub> O] <sup>+</sup><br>581[M+H-C <sub>6</sub> H <sub>10</sub> O <sub>5</sub> -C <sub>6</sub> H <sub>12</sub> O <sub>6</sub> -2H <sub>2</sub> O] <sup>+</sup>                                                                                                                                                                                                                                                |                                                                                                                                                                                                                                                                                                                                                                                                                                                                                                                                         | Soyasaponin Ba (S)                            | DDC    |



| No. | $t_R$ (min) | [M+Na] <sup>+</sup> $m/z$<br>Detected | ppm   | [M-H] $m/z$<br>Detected | ppm | MW(Da)   | Formula                                         | MS/MS<br>ESI+                                                                                                                                                                       | ESI- | Identification      | Source |
|-----|-------------|---------------------------------------|-------|-------------------------|-----|----------|-------------------------------------------------|-------------------------------------------------------------------------------------------------------------------------------------------------------------------------------------|------|---------------------|--------|
| 32  | 14.640      | 943.5301 <sup>o</sup>                 | 4.3   |                         |     | 942.5188 | C <sub>48</sub> H <sub>78</sub> O <sub>18</sub> | 459[M+H-2C <sub>6</sub> H <sub>10</sub> O <sub>5</sub> -C <sub>6</sub> H <sub>8</sub> O <sub>6</sub> ] <sup>+</sup>                                                                 |      | Soyasaponin Bb (S)  | DDC    |
|     |             |                                       |       |                         |     |          |                                                 | 441[M+H-2C <sub>6</sub> H <sub>10</sub> O <sub>5</sub> -C <sub>6</sub> H <sub>10</sub> O <sub>7</sub> ] <sup>+</sup>                                                                |      |                     |        |
|     |             |                                       |       |                         |     |          |                                                 | 423[M+H-2C <sub>6</sub> H <sub>10</sub> O <sub>5</sub> -C <sub>6</sub> H <sub>10</sub> O <sub>7</sub> -H <sub>2</sub> O] <sup>+</sup>                                               |      |                     |        |
|     |             |                                       |       |                         |     |          |                                                 | 405[M+H-2C <sub>6</sub> H <sub>10</sub> O <sub>5</sub> -C <sub>6</sub> H <sub>10</sub> O <sub>7</sub> -2H <sub>2</sub> O] <sup>+</sup>                                              |      |                     |        |
|     |             |                                       |       |                         |     |          |                                                 | 943[M+H] <sup>+</sup>                                                                                                                                                               |      |                     |        |
|     |             |                                       |       |                         |     |          |                                                 | 797[M+H-C <sub>6</sub> H <sub>10</sub> O <sub>4</sub> ] <sup>+</sup>                                                                                                                |      |                     |        |
|     |             |                                       |       |                         |     |          |                                                 | 617[M+H-C <sub>6</sub> H <sub>10</sub> O <sub>4</sub> -C <sub>6</sub> H <sub>12</sub> O <sub>6</sub> ] <sup>+</sup>                                                                 |      |                     |        |
|     |             |                                       |       |                         |     |          |                                                 | 599[M+H-C <sub>6</sub> H <sub>10</sub> O <sub>4</sub> -C <sub>6</sub> H <sub>12</sub> O <sub>6</sub> -H <sub>2</sub> O] <sup>+</sup>                                                |      |                     |        |
|     |             |                                       |       |                         |     |          |                                                 | 581[M+H-C <sub>6</sub> H <sub>10</sub> O <sub>4</sub> -C <sub>6</sub> H <sub>12</sub> O <sub>6</sub> -2H <sub>2</sub> O] <sup>+</sup>                                               |      |                     |        |
|     |             |                                       |       |                         |     |          |                                                 | 459[M+H-C <sub>6</sub> H <sub>10</sub> O <sub>4</sub> -C <sub>6</sub> H <sub>10</sub> O <sub>5</sub> -C <sub>6</sub> H <sub>8</sub> O <sub>6</sub> ] <sup>+</sup>                   |      |                     |        |
| 33  | 14.979      | 797.4673 <sup>o</sup>                 | -1.11 |                         |     | 796.4609 | C <sub>42</sub> H <sub>68</sub> O <sub>14</sub> | 441[M+H-C <sub>6</sub> H <sub>10</sub> O <sub>4</sub> -C <sub>6</sub> H <sub>10</sub> O <sub>5</sub> -C <sub>6</sub> H <sub>10</sub> O <sub>7</sub> ] <sup>+</sup>                  |      | Soyasaponin Bb' (S) | DDC    |
|     |             |                                       |       |                         |     |          |                                                 | 423[M+H-C <sub>6</sub> H <sub>10</sub> O <sub>4</sub> -C <sub>6</sub> H <sub>10</sub> O <sub>5</sub> -C <sub>6</sub> H <sub>10</sub> O <sub>7</sub> ] <sup>+</sup>                  |      |                     |        |
|     |             |                                       |       |                         |     |          |                                                 | 405[M+H-C <sub>6</sub> H <sub>10</sub> O <sub>5</sub> -C <sub>6</sub> H <sub>10</sub> O <sub>7</sub> -2H <sub>2</sub> O] <sup>+</sup>                                               |      |                     |        |
|     |             |                                       |       |                         |     |          |                                                 | 767[M+H] <sup>+</sup>                                                                                                                                                               |      |                     |        |
|     |             |                                       |       |                         |     |          |                                                 | 635[M+H-C <sub>6</sub> H <sub>10</sub> O <sub>5</sub> ] <sup>+</sup>                                                                                                                |      |                     |        |
|     |             |                                       |       |                         |     |          |                                                 | 617[M+H-C <sub>6</sub> H <sub>12</sub> O <sub>6</sub> ] <sup>+</sup>                                                                                                                |      |                     |        |
|     |             |                                       |       |                         |     |          |                                                 | 599[M+H-C <sub>6</sub> H <sub>12</sub> O <sub>6</sub> -H <sub>2</sub> O] <sup>+</sup>                                                                                               |      |                     |        |
|     |             |                                       |       |                         |     |          |                                                 | 581[M+H-C <sub>6</sub> H <sub>12</sub> O <sub>6</sub> -2H <sub>2</sub> O] <sup>+</sup>                                                                                              |      |                     |        |
|     |             |                                       |       |                         |     |          |                                                 | 423[M+H-C <sub>6</sub> H <sub>10</sub> O <sub>5</sub> -C <sub>6</sub> H <sub>10</sub> O <sub>7</sub> -H <sub>2</sub> O] <sup>+</sup>                                                |      |                     |        |
|     |             |                                       |       |                         |     |          |                                                 | 405[M+H-C <sub>6</sub> H <sub>10</sub> O <sub>5</sub> -C <sub>6</sub> H <sub>10</sub> O <sub>7</sub> -2H <sub>2</sub> O] <sup>+</sup>                                               |      |                     |        |
| 34  | 15.212      | 767.4571 <sup>o</sup>                 | -0.68 |                         |     | 766.4503 | C <sub>41</sub> H <sub>66</sub> O <sub>13</sub> | 767[M+H] <sup>+</sup>                                                                                                                                                               |      | Soyasaponin Bc' (S) | DDC    |
|     |             |                                       |       |                         |     |          |                                                 | 635[M+H-C <sub>5</sub> H <sub>8</sub> O <sub>4</sub> ] <sup>+</sup>                                                                                                                 |      |                     |        |
|     |             |                                       |       |                         |     |          |                                                 | 617[M+H-C <sub>6</sub> H <sub>10</sub> O <sub>5</sub> ] <sup>+</sup>                                                                                                                |      |                     |        |
|     |             |                                       |       |                         |     |          |                                                 | 423[M+H-C <sub>5</sub> H <sub>8</sub> O <sub>4</sub> -C <sub>6</sub> H <sub>10</sub> O <sub>7</sub> -H <sub>2</sub> O] <sup>+</sup>                                                 |      |                     |        |
|     |             |                                       |       |                         |     |          |                                                 | 405[M+H-C <sub>5</sub> H <sub>8</sub> O <sub>4</sub> -C <sub>6</sub> H <sub>10</sub> O <sub>7</sub> -2H <sub>2</sub> O] <sup>+</sup>                                                |      |                     |        |
|     |             |                                       |       |                         |     |          |                                                 | 941[M+H] <sup>+</sup>                                                                                                                                                               |      |                     |        |
| 35  | 15.682      | 941.5095 <sup>o</sup>                 | -1.0  |                         |     | 940.5032 | C <sub>48</sub> H <sub>76</sub> O <sub>18</sub> | 795[M+H-C <sub>6</sub> H <sub>10</sub> O <sub>4</sub> ] <sup>+</sup>                                                                                                                |      | Soyasaponin Be (S)  | DDC    |
|     |             |                                       |       |                         |     |          |                                                 | 457[M+H-C <sub>6</sub> H <sub>10</sub> O <sub>4</sub> -C <sub>6</sub> H <sub>10</sub> O <sub>5</sub> -C <sub>6</sub> H <sub>8</sub> O <sub>6</sub> ] <sup>+</sup>                   |      |                     |        |
|     |             |                                       |       |                         |     |          |                                                 | 439[M+H-C <sub>6</sub> H <sub>10</sub> O <sub>4</sub> -C <sub>6</sub> H <sub>10</sub> O <sub>5</sub> -C <sub>6</sub> H <sub>10</sub> O <sub>7</sub> ] <sup>+</sup>                  |      |                     |        |
|     |             |                                       |       |                         |     |          |                                                 | 421[M+H-C <sub>6</sub> H <sub>10</sub> O <sub>4</sub> -C <sub>6</sub> H <sub>10</sub> O <sub>5</sub> -C <sub>6</sub> H <sub>10</sub> O <sub>7</sub> -H <sub>2</sub> O] <sup>+</sup> |      |                     |        |
|     |             |                                       |       |                         |     |          |                                                 | 941[M+H] <sup>+</sup>                                                                                                                                                               |      |                     |        |

I: iridoid glycosides; M: monoterpenoids; F: flavonoids; QA: Quinic acid derivatives; OA: organic acids; S: Soyasaponins.

<sup>o</sup> [M+H]<sup>+</sup>, <sup>§</sup> [M+K]<sup>+</sup>, <sup>☆</sup> [M+Cl]<sup>-</sup>, \* [M+CH<sub>3</sub>COO]<sup>-</sup>

<sup>§</sup> Confirmed with standard compound

**Table S2.** Identification of metabolites of ZZCD in feces of rat model of depression by UHPLC-Q-TOF-MS/MS

| No. | $t_R$ (min) | [M+H] <sup>+</sup>    |      | [M-H] <sup>-</sup>    |      | MW(Da)    | Formula                                          | MS/MS                                                                                                                                                                                                                                                                                                                                                                                                                                                                                                              |                                                                                                                                                                                                                                                                                                                                                                                                                                                                                                                                                                                                                                                                                                                                                                                                                                      | Identification                                                                                   |
|-----|-------------|-----------------------|------|-----------------------|------|-----------|--------------------------------------------------|--------------------------------------------------------------------------------------------------------------------------------------------------------------------------------------------------------------------------------------------------------------------------------------------------------------------------------------------------------------------------------------------------------------------------------------------------------------------------------------------------------------------|--------------------------------------------------------------------------------------------------------------------------------------------------------------------------------------------------------------------------------------------------------------------------------------------------------------------------------------------------------------------------------------------------------------------------------------------------------------------------------------------------------------------------------------------------------------------------------------------------------------------------------------------------------------------------------------------------------------------------------------------------------------------------------------------------------------------------------------|--------------------------------------------------------------------------------------------------|
|     |             | m/z                   | ppm  | m/z                   | ppm  |           |                                                  | ESI+                                                                                                                                                                                                                                                                                                                                                                                                                                                                                                               | ESI-                                                                                                                                                                                                                                                                                                                                                                                                                                                                                                                                                                                                                                                                                                                                                                                                                                 |                                                                                                  |
| M1  | 1.104       | 389.1432              | -2.6 | 387.1311              | 3.7  | 388.1369  | C <sub>17</sub> H <sub>24</sub> O <sub>10</sub>  | 213[M+H-C <sub>6</sub> H <sub>8</sub> O <sub>6</sub> ] <sup>+</sup><br>181[M+H-C <sub>6</sub> H <sub>8</sub> O <sub>6</sub> -CH <sub>2</sub> O] <sup>+</sup><br>163[M+H-C <sub>6</sub> H <sub>8</sub> O <sub>6</sub> -CH <sub>2</sub> O-H <sub>2</sub> O] <sup>+</sup><br>135[M+H-C <sub>6</sub> H <sub>8</sub> O <sub>6</sub> -CH <sub>2</sub> O-H <sub>2</sub> O-CO] <sup>+</sup><br>105[M+H-C <sub>6</sub> H <sub>8</sub> O <sub>6</sub> -CH <sub>2</sub> O-H <sub>2</sub> O-CO-CH <sub>2</sub> O] <sup>+</sup> | 211[M-H-C <sub>6</sub> H <sub>8</sub> O <sub>6</sub> ] <sup>-</sup><br>133[M-H-C <sub>6</sub> H <sub>8</sub> O <sub>6</sub> -CH <sub>2</sub> O-H <sub>2</sub> O-CO] <sup>-</sup>                                                                                                                                                                                                                                                                                                                                                                                                                                                                                                                                                                                                                                                     | Ring-opened metabolite of genipin-O-glucuronide 3-hydroxyl-1-deoxygenipin-10-β-D-glucuronide (I) |
| M2  | 1.838       | -                     | -    | 169.0135              | -4.7 | 170.0215  | C <sub>7</sub> H <sub>6</sub> O <sub>5</sub>     | -                                                                                                                                                                                                                                                                                                                                                                                                                                                                                                                  | 151[M-H-H <sub>2</sub> O] <sup>-</sup><br>125[M-H-CO <sub>2</sub> ] <sup>-</sup><br>241[M-H] <sup>-</sup><br>209[M-H-CH <sub>3</sub> OH] <sup>-</sup><br>163[M-H-C <sub>7</sub> H <sub>4</sub> O <sub>2</sub> -H <sub>2</sub> O] <sup>-</sup><br>101[M-H-C <sub>7</sub> H <sub>4</sub> O <sub>2</sub> ] <sup>-</sup><br>69[M-H-C <sub>7</sub> H <sub>4</sub> O <sub>2</sub> ] <sup>-</sup>                                                                                                                                                                                                                                                                                                                                                                                                                                           | 2,3,5-trihydroxybenzoic acid (OA)                                                                |
| M3  | 2.776       | -                     | -    | 241.0721              | 1.4  | 242.0790  | C <sub>21</sub> H <sub>14</sub> O <sub>6</sub>   | -                                                                                                                                                                                                                                                                                                                                                                                                                                                                                                                  | 153[M-H-80] <sup>-</sup><br>109[M-H-80-CO <sub>2</sub> ] <sup>-</sup><br>137[M-H-CO <sub>2</sub> ] <sup>-</sup><br>119[M-H-CO <sub>2</sub> -H <sub>2</sub> O] <sup>-</sup><br>341[M-H-H <sub>2</sub> O] <sup>-</sup><br>183[M-H-GluA] <sup>-</sup><br>165[M-H-GluA-H <sub>2</sub> O] <sup>-</sup>                                                                                                                                                                                                                                                                                                                                                                                                                                                                                                                                    | Hydroxylation of genipin(I)                                                                      |
| M4  | 2.914       | -                     | -    | 232.9757              | -1.7 | 233.9834  | C <sub>9</sub> H <sub>6</sub> O <sub>5</sub> S   | -                                                                                                                                                                                                                                                                                                                                                                                                                                                                                                                  | 329[M-H-HCOOH] <sup>-</sup><br>213[M-H-C <sub>6</sub> H <sub>10</sub> O <sub>2</sub> ] <sup>-</sup><br>195[M-H-C <sub>6</sub> H <sub>10</sub> O <sub>2</sub> -H <sub>2</sub> O] <sup>-</sup><br>167[M-H-C <sub>6</sub> H <sub>10</sub> O <sub>2</sub> -HCOOH] <sup>-</sup><br>125[M-H-C <sub>6</sub> H <sub>10</sub> O <sub>2</sub> -C <sub>3</sub> H <sub>4</sub> O <sub>3</sub> ] <sup>-</sup><br>69[M-H-C <sub>12</sub> H <sub>18</sub> O <sub>3</sub> ] <sup>-</sup><br>225[M-H-GluA] <sup>-</sup><br>207[M-H-GluA-H <sub>2</sub> O] <sup>-</sup><br>193[M-H-GluA-H <sub>2</sub> O-CH] <sup>-</sup><br>175[M-H-GluA-H <sub>2</sub> O-CH <sub>3</sub> O] <sup>-</sup><br>123[M-H-80-162-C <sub>7</sub> H <sub>8</sub> O <sub>3</sub> ] <sup>-</sup><br>101[M-H-80-162-C <sub>7</sub> H <sub>8</sub> O <sub>2</sub> ] <sup>-</sup> | Gentisic acid-O-sulfate (OA)                                                                     |
| M5  | 3.612       | -                     | -    | 181.0515              | 4.79 | 182.0579  | C <sub>9</sub> H <sub>10</sub> O <sub>4</sub>    | -                                                                                                                                                                                                                                                                                                                                                                                                                                                                                                                  | 225[M-H-GluA] <sup>-</sup><br>207[M-H-GluA-H <sub>2</sub> O] <sup>-</sup><br>193[M-H-GluA-H <sub>2</sub> O-CH] <sup>-</sup><br>175[M-H-GluA-H <sub>2</sub> O-CH <sub>3</sub> O] <sup>-</sup><br>123[M-H-80-162-C <sub>7</sub> H <sub>8</sub> O <sub>3</sub> ] <sup>-</sup><br>101[M-H-80-162-C <sub>7</sub> H <sub>8</sub> O <sub>2</sub> ] <sup>-</sup>                                                                                                                                                                                                                                                                                                                                                                                                                                                                             | Dihydrocaffeic acid (OA)                                                                         |
| M6  | 4.315       | -                     | -    | 359.1353              | 1.4  | 360.142   | C <sub>16</sub> H <sub>24</sub> O <sub>9</sub>   | -                                                                                                                                                                                                                                                                                                                                                                                                                                                                                                                  | 225[M-H-GluA] <sup>-</sup><br>207[M-H-GluA-H <sub>2</sub> O] <sup>-</sup><br>193[M-H-GluA-H <sub>2</sub> O-CH] <sup>-</sup><br>175[M-H-GluA-H <sub>2</sub> O-CH <sub>3</sub> O] <sup>-</sup><br>123[M-H-80-162-C <sub>7</sub> H <sub>8</sub> O <sub>3</sub> ] <sup>-</sup><br>101[M-H-80-162-C <sub>7</sub> H <sub>8</sub> O <sub>2</sub> ] <sup>-</sup>                                                                                                                                                                                                                                                                                                                                                                                                                                                                             | Ring-opened and methyl formate removal derivative of genipin-O-glucuronide (I)                   |
| M7  | 5.499       | -                     | -    | 375.1285              | -2.9 | 376.13695 | C <sub>16</sub> H <sub>24</sub> O <sub>10</sub>  | -                                                                                                                                                                                                                                                                                                                                                                                                                                                                                                                  | 329[M-H-HCOOH] <sup>-</sup><br>213[M-H-C <sub>6</sub> H <sub>10</sub> O <sub>2</sub> ] <sup>-</sup><br>195[M-H-C <sub>6</sub> H <sub>10</sub> O <sub>2</sub> -H <sub>2</sub> O] <sup>-</sup><br>167[M-H-C <sub>6</sub> H <sub>10</sub> O <sub>2</sub> -HCOOH] <sup>-</sup><br>125[M-H-C <sub>6</sub> H <sub>10</sub> O <sub>2</sub> -C <sub>3</sub> H <sub>4</sub> O <sub>3</sub> ] <sup>-</sup><br>69[M-H-C <sub>12</sub> H <sub>18</sub> O <sub>3</sub> ] <sup>-</sup><br>225[M-H-GluA] <sup>-</sup><br>207[M-H-GluA-H <sub>2</sub> O] <sup>-</sup><br>193[M-H-GluA-H <sub>2</sub> O-CH] <sup>-</sup><br>175[M-H-GluA-H <sub>2</sub> O-CH <sub>3</sub> O] <sup>-</sup><br>123[M-H-80-162-C <sub>7</sub> H <sub>8</sub> O <sub>3</sub> ] <sup>-</sup><br>101[M-H-80-162-C <sub>7</sub> H <sub>8</sub> O <sub>2</sub> ] <sup>-</sup> | Loss of CH <sub>2</sub> and cleavage of geniposide (I)                                           |
| M8  | 6.606       | 425.1046 <sup>o</sup> | -2.0 | 437.0863 <sup>☆</sup> | 1.6  | 402.1162  | C <sub>17</sub> H <sub>22</sub> O <sub>11</sub>  | 403[M+H] <sup>+</sup><br>227[M+H-162] <sup>+</sup>                                                                                                                                                                                                                                                                                                                                                                                                                                                                 | 225[M-H-GluA] <sup>-</sup><br>207[M-H-GluA-H <sub>2</sub> O] <sup>-</sup><br>193[M-H-GluA-H <sub>2</sub> O-CH] <sup>-</sup><br>175[M-H-GluA-H <sub>2</sub> O-CH <sub>3</sub> O] <sup>-</sup><br>123[M-H-80-162-C <sub>7</sub> H <sub>8</sub> O <sub>3</sub> ] <sup>-</sup><br>101[M-H-80-162-C <sub>7</sub> H <sub>8</sub> O <sub>2</sub> ] <sup>-</sup>                                                                                                                                                                                                                                                                                                                                                                                                                                                                             | Genipin-O-glucuronide (I)                                                                        |
| M9  | 7.364       | 425.1053 <sup>o</sup> | -0.3 | 437.0854 <sup>☆</sup> | -0.5 | 402.1162  | C <sub>17</sub> H <sub>22</sub> O <sub>11</sub>  | 403[M+H] <sup>+</sup><br>227[M+H-162] <sup>+</sup>                                                                                                                                                                                                                                                                                                                                                                                                                                                                 | 225[M-H-GluA] <sup>-</sup><br>207[M-H-GluA-H <sub>2</sub> O] <sup>-</sup><br>193[M-H-GluA-H <sub>2</sub> O-CH] <sup>-</sup><br>175[M-H-GluA-H <sub>2</sub> O-CH <sub>3</sub> O] <sup>-</sup><br>123[M-H-80-162-C <sub>7</sub> H <sub>8</sub> O <sub>3</sub> ] <sup>-</sup><br>101[M-H-80-162-C <sub>7</sub> H <sub>8</sub> O <sub>2</sub> ] <sup>-</sup>                                                                                                                                                                                                                                                                                                                                                                                                                                                                             | Genipin-O-glucuronide (I)                                                                        |
| M10 | 7.727       | 367.1150              | -    | -                     | -    | -         | -                                                | 367[M+H] <sup>+</sup><br>287[M+H-80] <sup>+</sup><br>431[M+H] <sup>+</sup><br>255[M-Glu A +H] <sup>+</sup><br>227[M-Glu A-CO+H] <sup>+</sup><br>199[M+H-2CO] <sup>+</sup><br>137[M+H-C <sub>8</sub> H <sub>6</sub> O] <sup>+</sup>                                                                                                                                                                                                                                                                                 | -                                                                                                                                                                                                                                                                                                                                                                                                                                                                                                                                                                                                                                                                                                                                                                                                                                    | M- O-sulfate (unidentified) (O)                                                                  |
| M11 | 8.005       | 431.0963              | -2.3 | -                     | -    | 430.0900  | C <sub>21</sub> H <sub>18</sub> O <sub>10</sub>  | 227[M+H-2CO] <sup>+</sup><br>199[M+H-2CO] <sup>+</sup><br>137[M+H-C <sub>8</sub> H <sub>6</sub> O] <sup>+</sup>                                                                                                                                                                                                                                                                                                                                                                                                    | -                                                                                                                                                                                                                                                                                                                                                                                                                                                                                                                                                                                                                                                                                                                                                                                                                                    | Daidzein-O-glucuronide (F)                                                                       |
| M12 | 8.150       | -                     | -    | 305.0322              | -4.6 | 306.0409  | C <sub>11</sub> H <sub>14</sub> O <sub>8</sub> S | -                                                                                                                                                                                                                                                                                                                                                                                                                                                                                                                  | 225[M-H-80] <sup>-</sup><br>207[M-H-80-H <sub>2</sub> O] <sup>-</sup><br>193[M-H-80-H <sub>2</sub> O-CH] <sup>-</sup><br>175[M-H-80-H <sub>2</sub> O-CH <sub>3</sub> O] <sup>-</sup><br>123[M-H-80-C <sub>7</sub> H <sub>8</sub> O <sub>3</sub> ] <sup>-</sup><br>101[M-H-80-C <sub>7</sub> H <sub>8</sub> O <sub>2</sub> ] <sup>-</sup>                                                                                                                                                                                                                                                                                                                                                                                                                                                                                             | Genipin-O-sulfate (I)                                                                            |
| M13 | 8.289       | -                     | -    | 263.0592              | -0.8 | 264.0668  | C <sub>10</sub> H <sub>16</sub> O <sub>6</sub> S | -                                                                                                                                                                                                                                                                                                                                                                                                                                                                                                                  | 183[M-H-80] <sup>-</sup>                                                                                                                                                                                                                                                                                                                                                                                                                                                                                                                                                                                                                                                                                                                                                                                                             | Jasminodiol-O-sulfate (M)                                                                        |
| M14 | 8.621       | 461.1065              | -2.9 | -                     | -    | 460.1006  | C <sub>22</sub> H <sub>20</sub> O <sub>11</sub>  | 285[M+H-C <sub>6</sub> H <sub>8</sub> O <sub>6</sub> ] <sup>+</sup><br>270[M+H-C <sub>6</sub> H <sub>8</sub> O <sub>6</sub> -CH <sub>2</sub> ] <sup>+</sup><br>242[M+H-C <sub>6</sub> H <sub>8</sub> O <sub>6</sub> -CH <sub>2</sub> -CO] <sup>+</sup><br>225[M+H-C <sub>6</sub> H <sub>8</sub> O <sub>6</sub> -CH <sub>2</sub> -CO-OH] <sup>+</sup>                                                                                                                                                               | -                                                                                                                                                                                                                                                                                                                                                                                                                                                                                                                                                                                                                                                                                                                                                                                                                                    | Glycitein-O-glucuronide (F)                                                                      |

| No. | $t_R$ (min) | [M+H] <sup>+</sup>                |             | [M-H] <sup>-</sup> |      | MW(Da)   | Formula                                           | MS/MS                                                                                         |                                                                                                                                                                                                                                                                                                                                                                                              | Identification                                                |
|-----|-------------|-----------------------------------|-------------|--------------------|------|----------|---------------------------------------------------|-----------------------------------------------------------------------------------------------|----------------------------------------------------------------------------------------------------------------------------------------------------------------------------------------------------------------------------------------------------------------------------------------------------------------------------------------------------------------------------------------------|---------------------------------------------------------------|
|     |             | m/z                               | ppm         | m/z                | ppm  |          |                                                   | ESI+                                                                                          | ESI-                                                                                                                                                                                                                                                                                                                                                                                         |                                                               |
|     |             | Detected                          | ppm         | Detected           | ppm  |          |                                                   | 197[M+H-C <sub>6</sub> H <sub>8</sub> O <sub>6</sub> -CH <sub>3</sub> -2CO-OH] <sup>+</sup>   |                                                                                                                                                                                                                                                                                                                                                                                              |                                                               |
| M15 | 8.905       | -                                 | -           | 467.0873           | 1.74 | 468.0938 | C <sub>27</sub> H <sub>24</sub> O <sub>13</sub> S |                                                                                               | 387[M-H-SO <sub>3</sub> ] <sup>-</sup><br>225[M-H-SO <sub>3</sub> -C <sub>6</sub> H <sub>10</sub> O <sub>5</sub> ] <sup>-</sup><br>207[M-H-SO <sub>3</sub> -C <sub>6</sub> H <sub>10</sub> O <sub>5</sub> -H <sub>2</sub> O] <sup>-</sup><br>101[M-H-C <sub>13</sub> H <sub>18</sub> O <sub>10</sub> S] <sup>-</sup><br>96[M-H-C <sub>17</sub> H <sub>23</sub> O <sub>9</sub> ] <sup>-</sup> | Glycitein -O -Sulfate (F)                                     |
| M16 | 9.104       | 465.1896                          | -           | -                  | -    | -        | -                                                 | 289[M+H-176] <sup>+</sup><br>209[M+H-176-80] <sup>+</sup><br>345 [M+H] <sup>+</sup>           | -                                                                                                                                                                                                                                                                                                                                                                                            | M-O-sulfate-glucuronide (unidentified) (O)                    |
| M17 | 9.142       | 367.1371 <sup>o</sup>             | 2.1         | 343.1387           | -3.2 | 344.1471 | C <sub>16</sub> H <sub>24</sub> O <sub>8</sub>    |                                                                                               | 343[M-H] <sup>-</sup><br>167[M-H-GluA] <sup>-</sup>                                                                                                                                                                                                                                                                                                                                          | Ring-opened and reduced products of genipin-O-glucuronide (I) |
| M18 | 9.854       | 345.1549<br>367.1357 <sup>o</sup> | 1.5<br>-1.7 | 343.188            | -3.0 | 344.1471 | C <sub>16</sub> H <sub>24</sub> O <sub>8</sub>    |                                                                                               | 343[M-H] <sup>-</sup><br>167[M-H-GluA] <sup>-</sup>                                                                                                                                                                                                                                                                                                                                          | Ring-opened and reduced products of genipin-O-glucuronide (I) |
| M19 | 11.154      | 469.0748 <sup>o</sup><br>447.0903 | 1.4<br>-4.2 | -                  | -    | 446.0849 | C <sub>21</sub> H <sub>18</sub> O <sub>11</sub>   | 447 [M+H] <sup>+</sup> ,<br>293 [M-Glu A+Na] <sup>+</sup> ,<br>271 [M-Glu A +H] <sup>+</sup>  | -                                                                                                                                                                                                                                                                                                                                                                                            | Genistein-O-glucuronide (F)                                   |
| M20 | 14.721      | 635.4163                          | 1.48        | -                  | -    | 634.8510 | C <sub>36</sub> H <sub>58</sub> O <sub>9</sub>    | 441 [M-GluA -OH] <sup>+</sup><br>423 [M- GluA -OH-H <sub>2</sub> O] <sup>+</sup>              | -                                                                                                                                                                                                                                                                                                                                                                                            | Soyasapogenol B-O- glucuronide                                |
| M21 | 15.425      | 539.3392                          | -1.64       |                    |      | 538.7840 | C <sub>36</sub> H <sub>58</sub> O <sub>6</sub> S  | 441 [M-SO <sub>3</sub> H -OH] <sup>+</sup><br>423 [M- GluA -OH-H <sub>2</sub> O] <sup>+</sup> |                                                                                                                                                                                                                                                                                                                                                                                              | Soyasapogenol B-O-sulfate                                     |

I: iridoid glycosides-related metabolites; M: monoterpenoids-related metabolites; F: flavonoids-related metabolites; OA: organic acids-related metabolites; S: Soyasaponins-related metabolites; O: other metabolites.

<sup>o</sup>[M+Na]<sup>+</sup>, <sup>\*</sup>[M+Cl]<sup>-</sup>
